# Supplementary material for: Disposable Electrochemical Sensors for Highly Sensitive Detection of Chlorpromazine in Human Whole Blood Based on the Silica Nanochannel Array Modified Screen-Printed Carbon Electrode
Source: MDPI journal article supplement (doi:10.3390/molecules27238200), 2022-11-24
Supplement: s1 [file s1]

# **Disposable electrochemical sensors for highly sensitive detection of chlorpromazine in human whole blood based on the silica nanochannel array modified screen-printed carbon electrode**

*Qianqian Han<sup>1,‡</sup>, Tongtong Zhang<sup>2,‡</sup>, Meifang Wang<sup>1</sup>, Fei Yan<sup>1,\*</sup> and Jiyang Liu<sup>1,\*</sup>*

<sup>1</sup> Key Laboratory of Surface & Interface Science of Polymer Materials of Zhejiang Province, Department of Chemistry, Zhejiang Sci-Tech University, Hangzhou 310018, China

<sup>2</sup> Key Laboratory of Integrated Oncology and Intelligent Medicine of Zhejiang Province, Department of Hepatobiliary and Pancreatic Surgery, Affiliated Hangzhou First People's Hospital, Zhejiang University School of Medicine, Hangzhou, 310006, China

<sup>‡</sup> These two authors contributed equally.

\* Corresponding author. E-mail: feifei19881203@126.com or yanfei@zstu.edu.cn (F.Y.); liujy@zstu.edu.cn (J.L.)

## **Table of Contents**

### **S1. Electrochemical reaction of CPZ on the electrode surface**

### **S2. Effect of scan rate on the CV responses**

### **S3. Optimization of experimental conditions**

#### **S3.1 preconcentration time**

#### **S3.2 pH of supporting electrolyte**

### **S4. Electrochemical detection of CPZ in human whole blood using bare SPCE and ErGO/SPCE**

### **S5. Anti-interference, stability and reproducibility ability of VMSF/ErGO/GCE**

### **S6. Regeneration ability of VMSF/ErGO/GCE, ErGO/SPCE and bare SPCE**

### **S7. Electrochemical detection of CPZ in undiluted human whole blood samples**

### S1. Electrochemical reaction of CPZ on the electrode surface

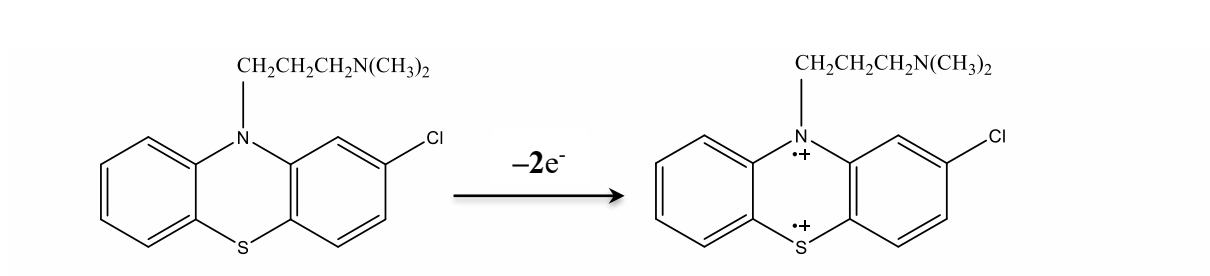

**Scheme S1** Electrochemical reaction of CPZ on the electrode surface.

## S2. Effect of scan rate on the CV responses

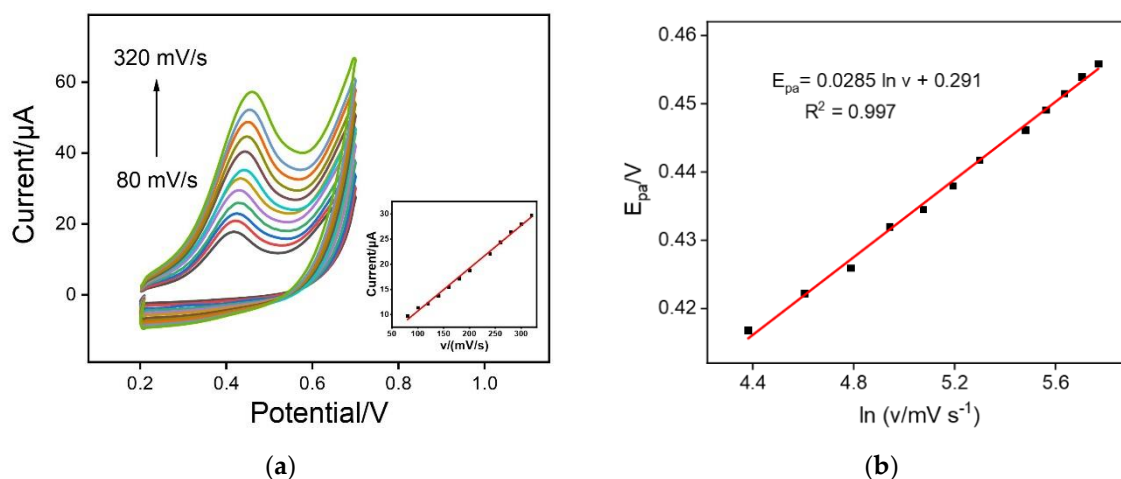

**Figure S1** (a) Effect of scan rates ( $v$ ) on the redox behavior of 20  $\mu\text{M}$  CPZ in 0.1 M PBS (pH 6.0) at the VMSF/ErGO/SPCE. Inset depicts the linear relationship of anodic peak current with scan rate. (b) Relationship between anodic peak potential ( $E_{pa}$ ) and  $\ln v$ .

### S3. Optimization of experimental conditions

#### S3.1 preconcentration time

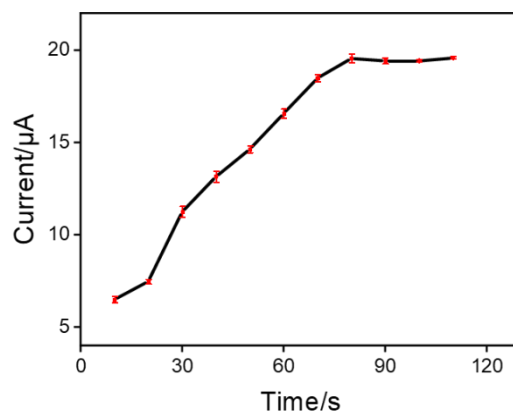

**Figure S2** Time-dependent plots at the VMSF/ErGO/SPCE in 0.1 M PBS solution (pH 6.0) containing 20  $\mu\text{M}$  CPZ. The error bars represent the standard deviation (SD) of three measurements.

### S3.2 pH of supporting electrolyte

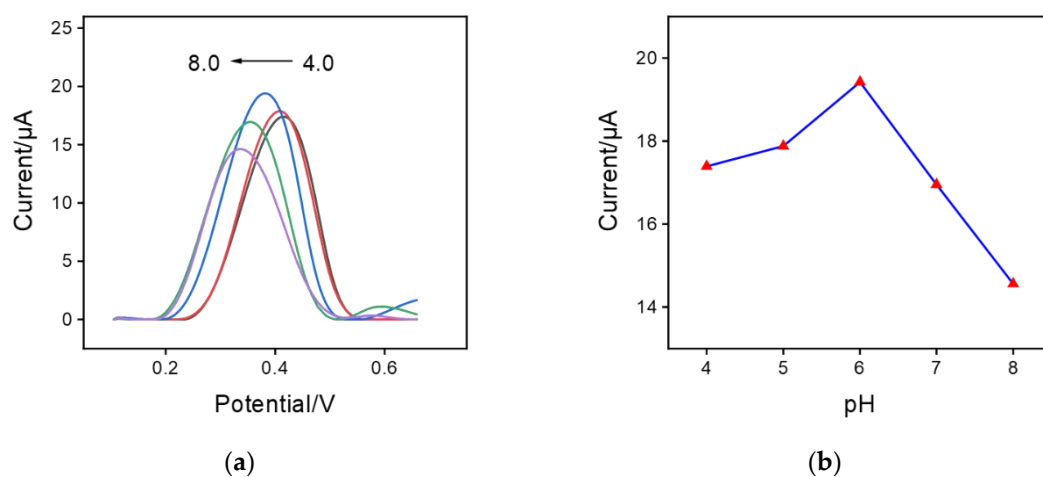

**Figure S3** (a) DPV curves obtained at the VMSF/ErGO/SPCE in 0.1 M PBS solution containing 20  $\mu$ M CPZ at various pH values. (b) Effect of pH of supporting electrolyte on the anodic peak current of CPZ.

#### S4. Electrochemical detection of CPZ in human whole blood using bare SPCE and ErGO/SPCE

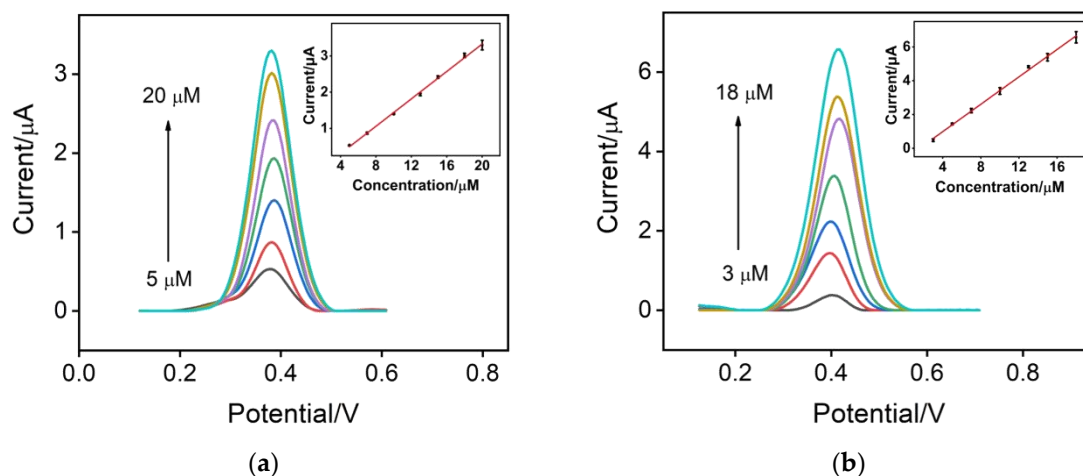

**Figure S4** DPV curves of bare SPCE **(a)** and ErGO/SPCE **(b)** in human blood samples diluted by a factor of 50 using 0.1 M PBS solution (pH 6.0) containing different concentrations of CPZ. Insets are corresponding calibration curves and the error bars represent the SD of three measurements.

**Table S1.** Comparison of electrochemical detection performance towards CPZ at the various electrodes in 50-time diluted human whole blood samples

| Electrode      | Linear range (μM) | Sensitivity (μA μM <sup>-1</sup> ) | LOD (nM) |
|----------------|-------------------|------------------------------------|----------|
| bare SPCE      | 5–20              | 0.1889                             | 31.8     |
| ErGO/SPCE      | 3–18              | 0.4050                             | 14.8     |
| VMSF/ErGO/SPCE | 0.5–20            | 0.9239                             | 6.5      |

### S5. Anti-interference, stability and reproducibility ability of VMSF/ErGO/GCE

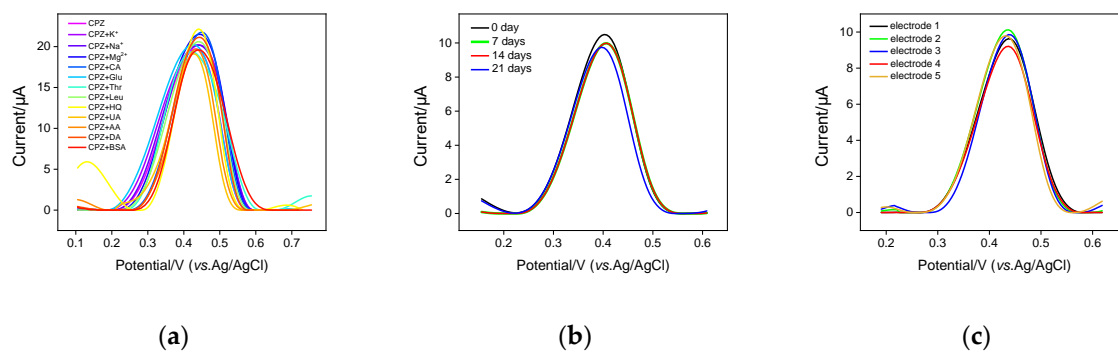

**Figure S5** (a) DPV curves obtained from VMSF/ErGO/SPCE for detection of 20  $\mu\text{M}$  CPZ in the presence and absence of added interfering species. The concentration of BSA is 6  $\mu\text{M}$  and the concentration of other interfering species are 1 mM. Stability (b) and reproducibility (c) of sensors.

### S6. Regeneration ability of VMSF/ErGO/GCE, ErGO/SPCE and bare SPCE

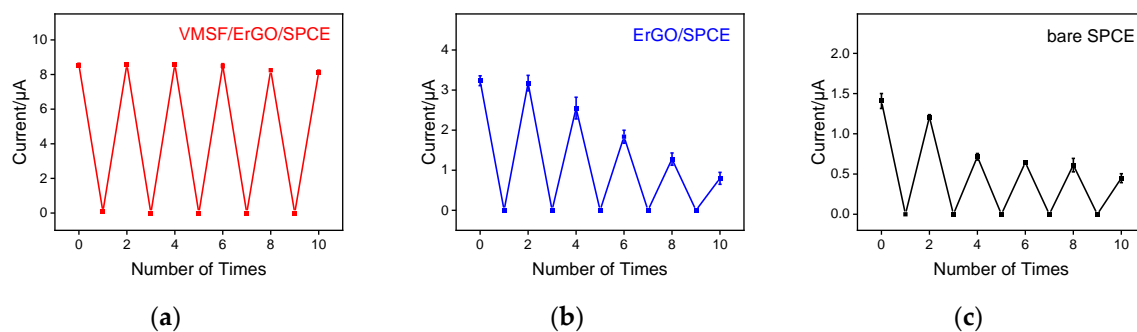

**Figure S6** Peak currents and usage times curves of VMSF/ErGO/SPCE (a), ErGO/SPCE (b) and bare SPCE (c) in 50-time diluted human blood samples with or without 10  $\mu\text{M}$  CPZ. To realize the regeneration, electrodes were soaked into a HCl-ethanol solution.



### S7. Electrochemical detection of CPZ in undiluted human whole blood samples

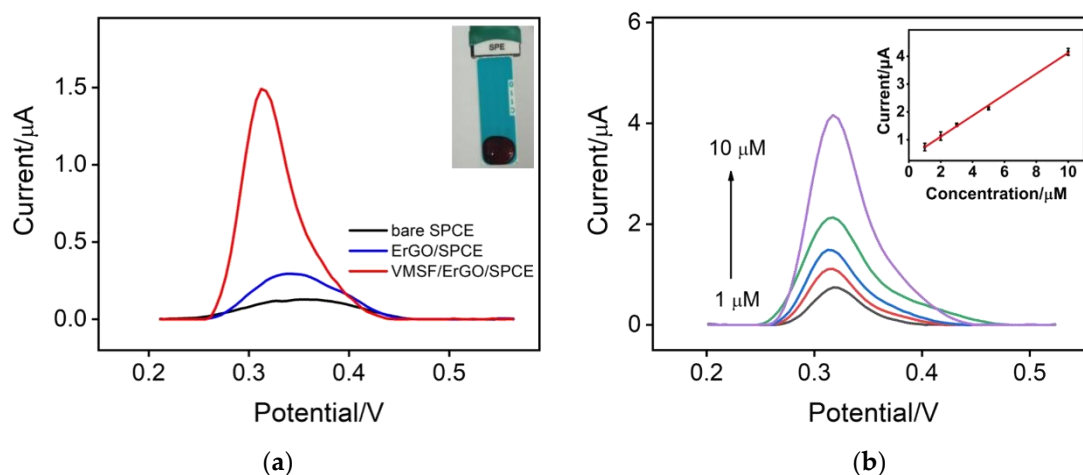

**Figure S7** (a) DPV curves of bare SPCE, ErGO/SPCE and VMSF/ErGO/SPCE in human whole blood samples containing 3  $\mu\text{M}$  CPZ; Inset is the photograph of VMSF/ErGO/SPCE used for analysis of CPZ in undiluted human whole blood. (b) DPV curves of VMSF/ErGO/SPCE in human blood samples containing CPZ ranging from 1  $\mu\text{M}$  to 10  $\mu\text{M}$ . Inset is the corresponding calibration curve and the error bars represent the SD of three measurements.
